# Supplementary material
Source: ML conference proceedings conference paper supplement (https://openreview.net/forum?id=H8qm5rqGZY)
Supplement: supplementary_material [file Supplementary.pdf › Supplementary.pdf]

## **Code and Resources**

To support reproducibility and facilitate further research, we provide source code at the following anonymous repository:

<https://anonymous.4open.science/r/EARL-F338eoiwrenmdfogf/>
